# Supplementary material for: Comparative analysis of Zn(ii)-complexes as model metalloenzymes for mimicking Jack bean urease
Source: Royal Society of Chemistry journal article supplement (doi:10.1039/d3dt03775d), 2024-01-01
Supplement: d3dt03775d1.pdf [file d3dt03775d1.pdf]

## *Supporting information*

Total number of pages: 19  
Total number of Figures: 11  
Total number of Tables: 8  
Total number of Schemes: 1

### **Comparative analysis of Zn(II)-Complexes as model metalloenzyme for mimicking Jack Bean Urease**

Rinku Ghanta,<sup>‡</sup> Tania Chowdhury,<sup>\*‡</sup> Avik Ghosh,<sup>‡</sup> Avijit K. Das,<sup>‡</sup> Tanmay Chattopadhyay<sup>‡\*</sup>

<sup>‡</sup>*Department of Chemistry, Diamond Harbour Women's University, Diamond Harbour Road, Sarisha, South 24 Pgs, 743368*

<sup>\*</sup>*Indian Association for the Cultivation of Science, 2A & 2B, Raja S. C. Mullick Road, Jadavpur, Kolkata-700032, India Kolkata 700032, India*

# Index

| Sl. No. | Contents                                                                                                                                        | Page No. |
|---------|-------------------------------------------------------------------------------------------------------------------------------------------------|----------|
| 1.      | NMR spectra of ligand <b>HL<sup>1</sup></b> (Fig. S1)                                                                                           | S3       |
| 2.      | NMR spectra of ligand <b>HL<sup>2</sup></b> (Fig. S2)                                                                                           | S3       |
| 3.      | FT-IR studies of <b>HL<sup>1</sup></b> and <b>PPR-HMB-Zn</b> (Fig. S3)                                                                          | S4       |
| 4.      | FT-IR studies of <b>HL<sup>2</sup></b> and <b>PZ-HMB-Zn</b> (Fig. S4)                                                                           | S4       |
| 5.      | UV-vis studies of <b>HL<sup>1</sup></b> and <b>PPR-HMB-Zn</b> (Fig. S5)                                                                         | S5       |
| 6.      | UV-vis studies of <b>HL<sup>2</sup></b> and <b>PZ-HMB-Zn</b> (Fig. S6)                                                                          | S5       |
| 7.      | ESI-MS Spectra of complex <b>PPR-HMB-Zn</b> (Fig. S7)                                                                                           | S6       |
| 8.      | ESI-MS Spectra of complex <b>PZ-HMB-Zn</b> (Fig. S8)                                                                                            | S6       |
| 9.      | Phosphatase activity of <b>PZ-HMB-Zn</b> (Fig. S9)                                                                                              | S7       |
| 10.     | Plausible mechanism of phosphatase activity for <b>PZ-HMB-Zn</b> (Scheme S1)                                                                    | S8       |
| 11.     | Urease activity of <b>PZ-HMB-Zn</b> (Fig. S10)                                                                                                  | S9       |
| 12.     | Mechanism of urease activity for <b>PZ-HMB-Zn</b> (Fig. S11)                                                                                    | S9       |
| 13.     | Coordination bond lengths (Å) and angles (°) for complex <b>PPR-HMB-Zn</b> (Table S1, S2)                                                       | S10-S11  |
| 14.     | Coordination bond lengths (Å) and angles (°) for complex <b>PZ-HMB-Zn</b> (Table S4, S5)                                                        | S11-S13  |
| 15.     | Hydrogen bonding distances and angles for the complexes (Table S3, S6)                                                                          |          |
| 16.     | <b>Kinetic parameters of Lineweaver-Burk plot for Phosphatase and Urease activity of both the complexes PPR-HMB-Zn and PZ-HMB-Zn (Table S7)</b> | S13      |
| 17.     | <b>Comparison of kinetic parameters between our synthesized complexes to the literature survey for phosphatase-like activity (Table S8)</b>     | S14      |
| 18.     | DFT: Coordinates of the optimized Complexes                                                                                                     | S15-S20  |

## NMR

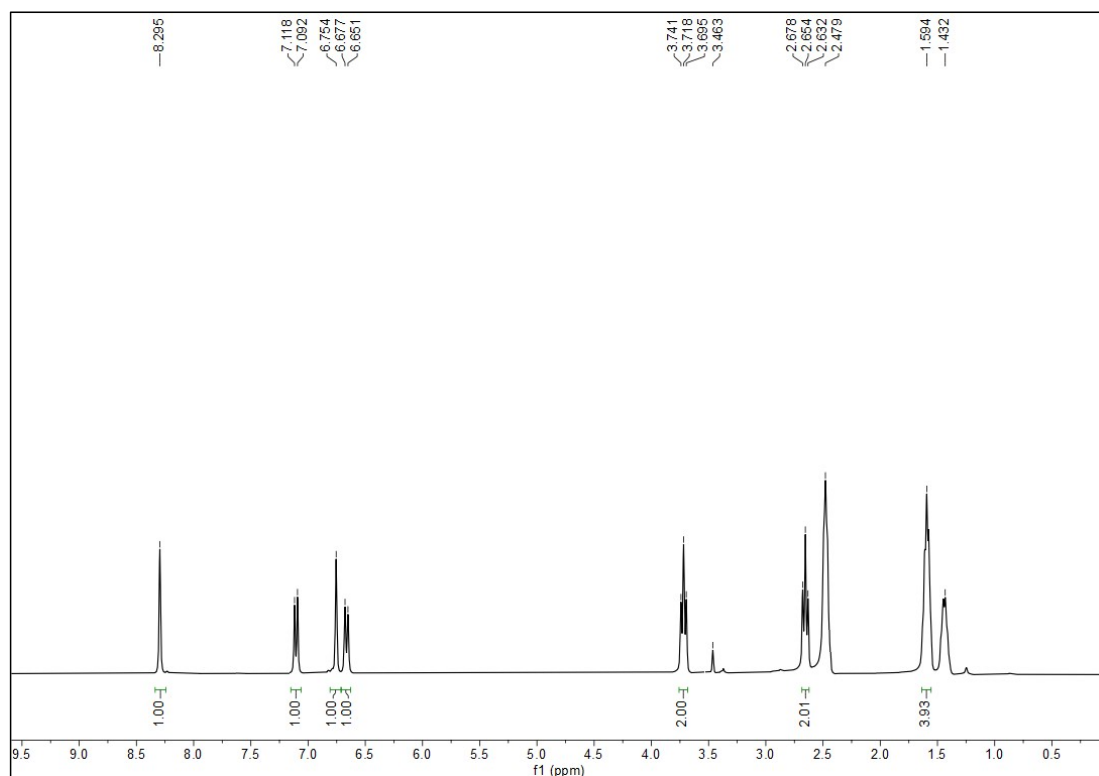

**Fig. S1.** <sup>1</sup>H NMR spectrum of ligand HL<sup>1</sup>

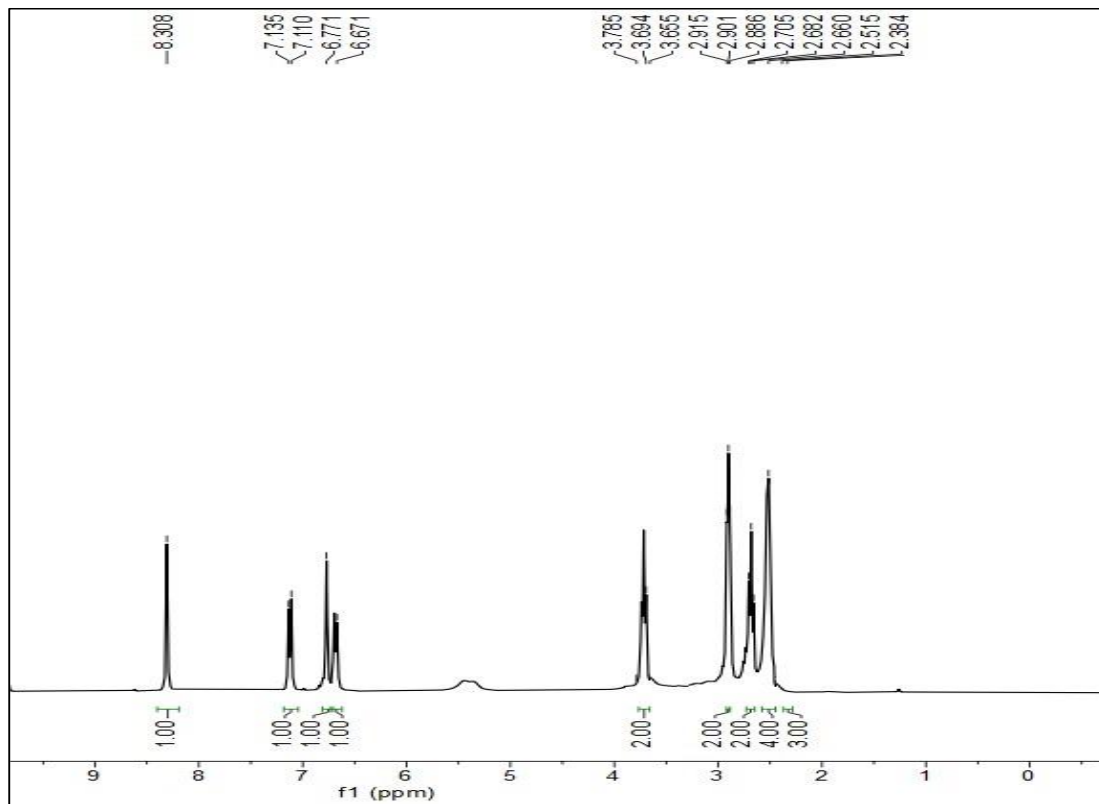

**Fig. S2.** <sup>1</sup>H NMR spectrum of ligand HL<sup>2</sup>

**FT-IR:**

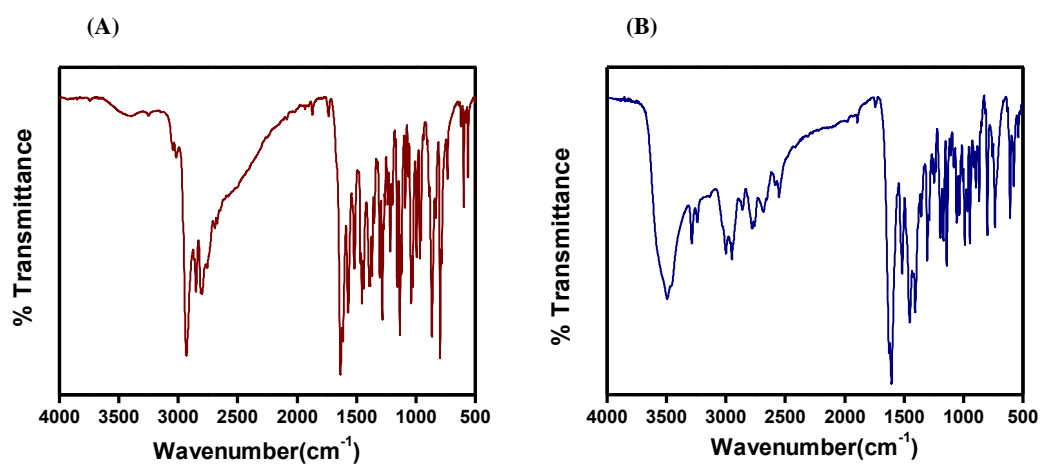

**Fig. S3.** FT-IR spectrum of (A) HL<sup>1</sup>, (B) PPR-HMB-Zn

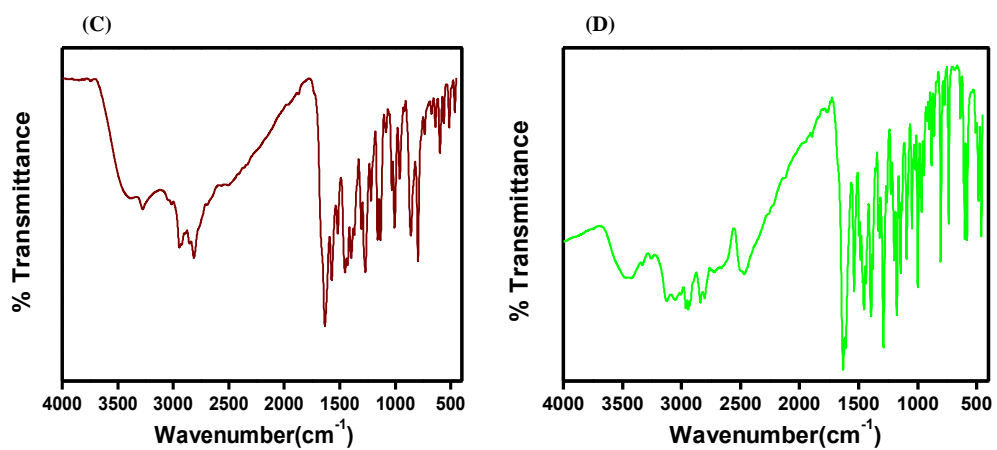

**Fig. S4.** FT-IR spectrum of (C) HL<sup>2</sup>, (D) PZ-HMB-Zn

UV-Vis

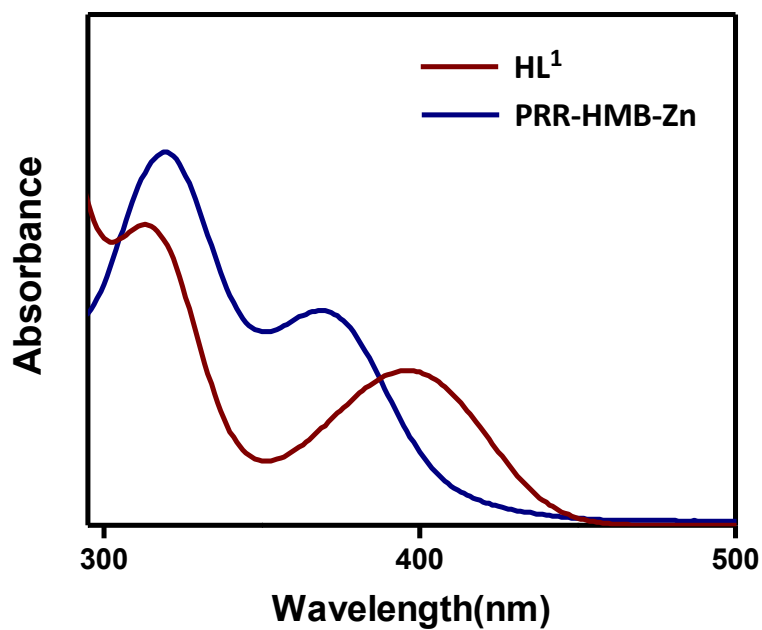

Fig. S5. UV-vis spectrum of ligand HL<sup>1</sup> and **PRR-HMB-Zn** complex

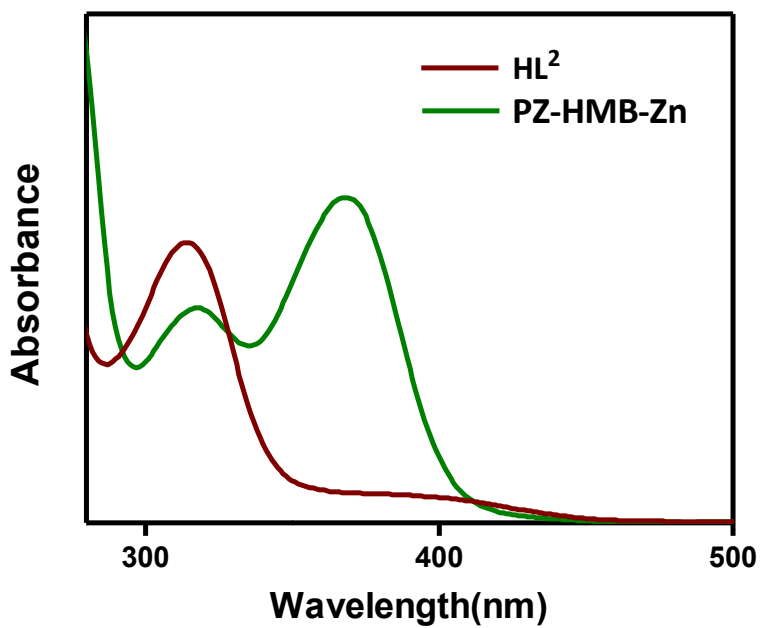

Fig. S6. UV-vis spectrum of ligand HL<sup>2</sup> and **PZ-HMB-Zn** complex

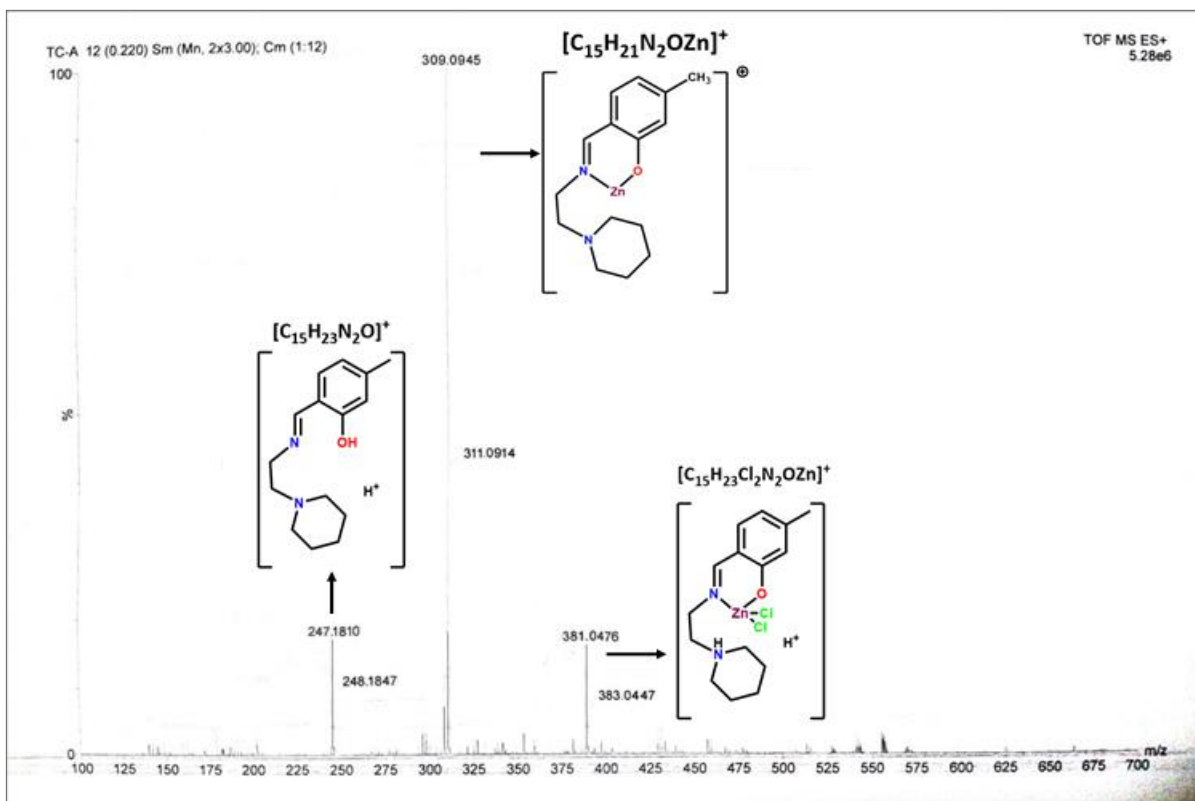

Fig. S7. ESI-MS spectra of PPR-HMB-Zn complex

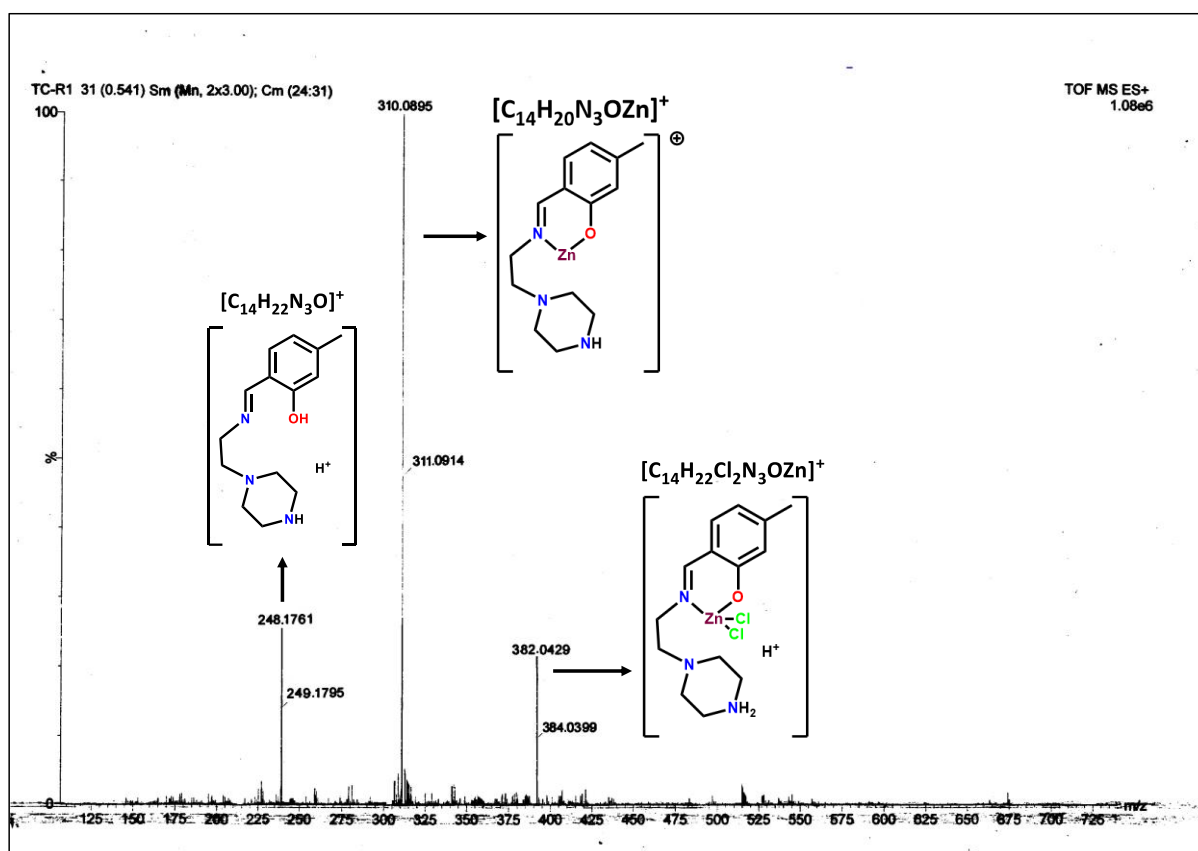

Fig. S8. ESI-MS spectra of PZ-HMB-Zn complex

### Phosphatase activity of PZ-HMB-Zn:

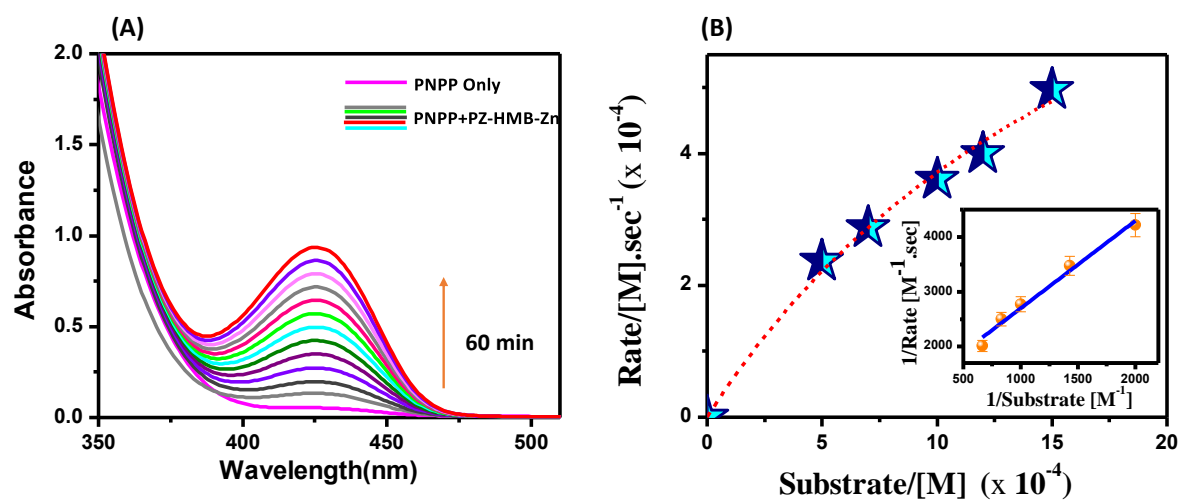

**Fig. S9.** (A) Time dependent wavelength scan for the hydrolysis of PNPP in the presence of **PZ-HMB-Zn** complex recorded at 25<sup>0</sup>C at intervals of 5 min (B) Michaelis-Menten kinetics plot attained from absorption profile of PNPP adding **PZ-HMB-Zn** Complex owing to the accumulation of p-nitrophenolate ( $\lambda_{\max}= 425\text{nm}$ ). Inset shows Lineweaver-Burk plot, slope = 1.59768, intercept =1101.293,  $R^2= 0.97838$ .

### Mechanism of Phosphatase activity for PZ-HMB-Zn:

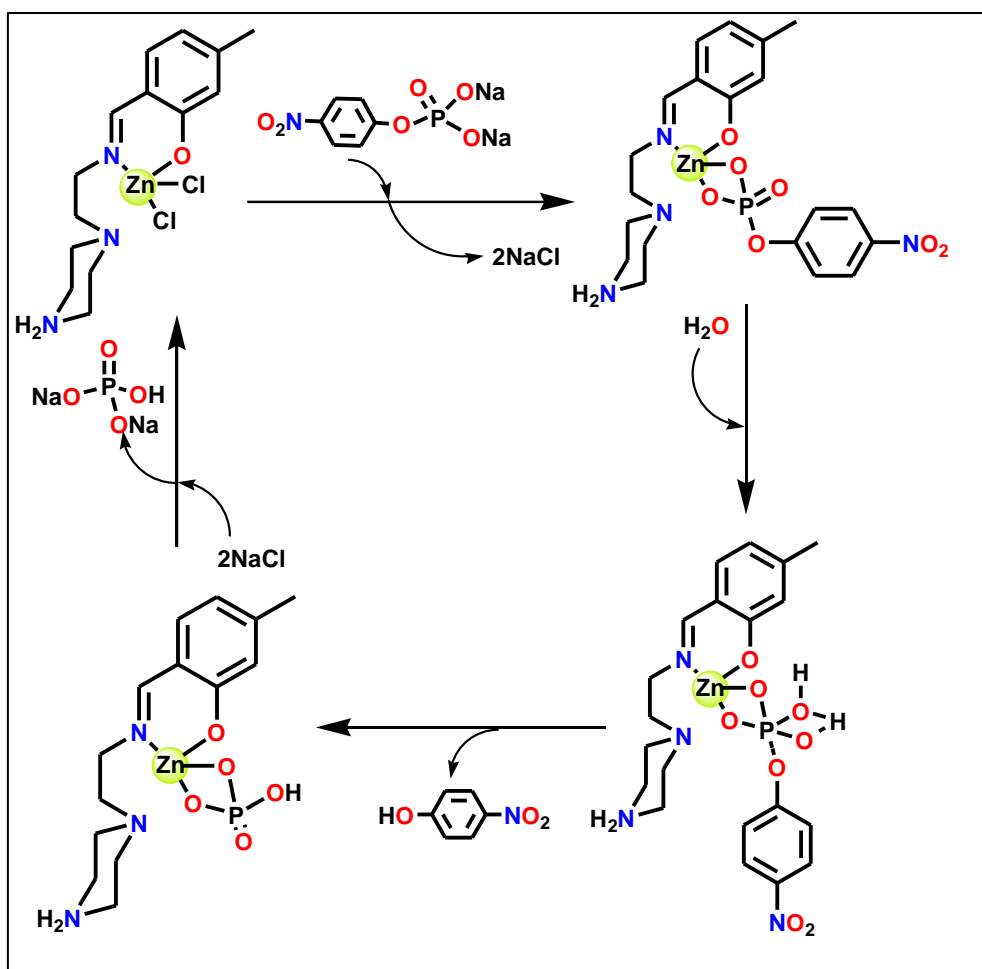

**Scheme S1.** Plausible mechanistic aspect of **PZ-HMB-Zn** complex mediated hydrolytic cleavage of P-O bond of 4-NPP.



## Urease activity of PZ-HMB-Zn:

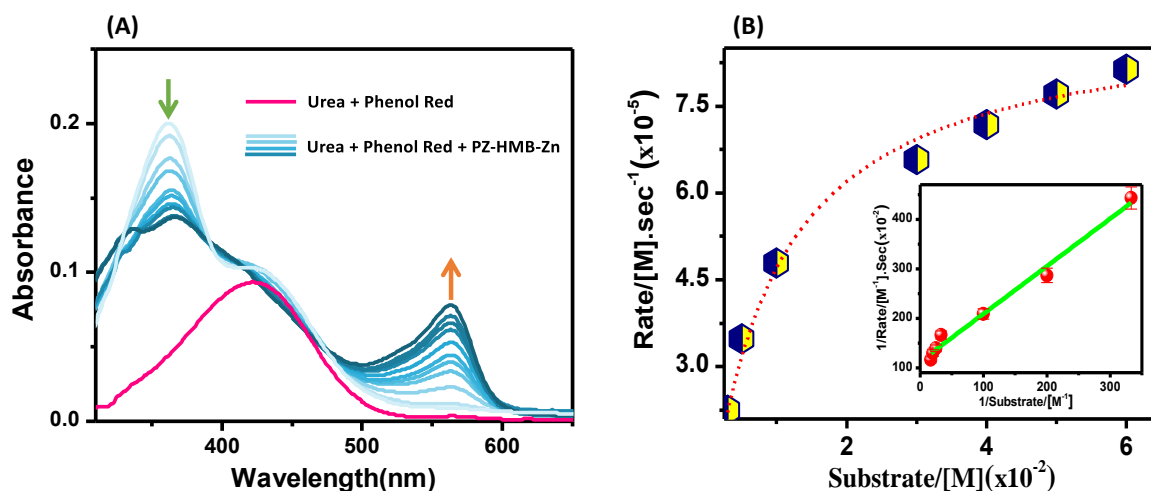

**Fig. S10.** (A) Typical UV-metric wavelength scan of phenol red recorded during a kinetic run for the **PZ-HMB-Zn** catalyzed hydrolysis of urea (B) Michaelis-Menten kinetics plot attained from absorption profile of phenol red recorded at 563 nm for the hydrolysis of urea with catalytic addition of **PZ-HMB-Zn**; inset shows Lineweaver-Burk plot, slope = 96.208, intercept = 11276,  $R^2 = 0.9844$ .

## Mechanism for PZ-HMB-Zn:

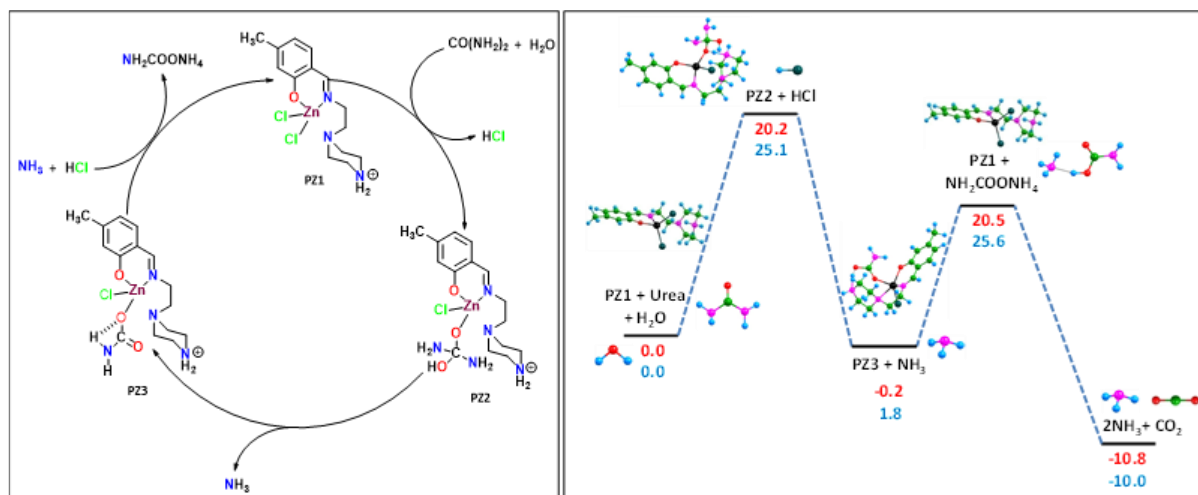

**Fig. S11.** Left panel: DFT supported plausible mechanism for the catalytic involvement of **PZ-HMB-Zn** in urea hydrolysis; Right panel: associated energy profile diagram for the catalysis mechanism carried out using functionals TPSSH (top) and B3LYP (bottom).

**Table S1.** Bond Lengths (Å) for Complex **PPR-HMB-Zn**.

|     |     | Length/Å  |     |     | Length/Å  |
|-----|-----|-----------|-----|-----|-----------|
| Zn1 | Cl1 | 2.225(2)  | C2  | C7  | 1.402(10) |
| Zn1 | Cl2 | 2.284(2)  | C3  | C4  | 1.388(11) |
| Zn1 | N1  | 2.047(6)  | C4  | C5  | 1.423(11) |
| Zn1 | O1  | 1.963(5)  | C5  | C6  | 1.443(10) |
| N1  | C8  | 1.293(10) | C5  | C8  | 1.448(10) |
| N1  | C9  | 1.474(9)  | C6  | C7  | 1.434(10) |
| N2  | C10 | 1.506(9)  | C9  | C10 | 1.535(10) |
| N2  | C11 | 1.515(9)  | C11 | C12 | 1.524(11) |
| N2  | C15 | 1.492(10) | C12 | C13 | 1.518(12) |
| O1  | C6  | 1.330(9)  | C13 | C14 | 1.529(12) |
| C1  | C2  | 1.522(10) | C14 | C15 | 1.533(11) |

**Table S2.** Bond Angles (°) for Complex **PPR-HMB-Zn**.

|     |     | Angle/° |            |    | Angle/° |    |          |
|-----|-----|---------|------------|----|---------|----|----------|
| Cl1 | Zn1 | Cl2     | 113.82(8)  | C3 | C4      | C5 | 122.3(7) |
| N1  | Zn1 | Cl1     | 110.01(19) | C4 | C5      | C6 | 118.2(6) |
| N1  | Zn1 | Cl2     | 110.42(18) | C4 | C5      | C8 | 115.7(7) |
| O1  | Zn1 | Cl1     | 117.84(16) | C8 | C5      | C6 | 125.9(6) |
| O1  | Zn1 | Cl2     | 108.49(16) | O1 | C6      | C5 | 123.9(6) |
| O1  | Zn1 | N1      | 94.6(2)    | O1 | C6      | C7 | 117.8(6) |
| C8  | N1  | Zn1     | 120.2(5)   | C7 | C6      | C5 | 118.3(6) |
| C8  | N1  | C9      | 117.5(6)   | C2 | C7      | C6 | 121.2(7) |

|             | Angle/°   |            | Angle/°  |
|-------------|-----------|------------|----------|
| C9 N1 Zn1   | 122.2(5)  | N1 C8 C5   | 126.2(7) |
| C10 N2 C11  | 109.6(6)  | N1 C9 C10  | 110.1(6) |
| C15 N2 C10  | 112.3(6)  | N2 C10 C9  | 110.8(6) |
| C15 N2 C11  | 112.1(5)  | N2 C11 C12 | 110.2(6) |
| C6 O1 Zn1   | 121.9(4)  | C13C12 C11 | 111.4(7) |
| C3 C2 C1    | 120.4(7)  | C12C13 C14 | 109.9(7) |
| C3 C2 C7    | 120.2(7)  | C15C14 C13 | 111.9(7) |
| C7 C2 C1    | 119.5(7)  | N2 C15 C14 | 110.9(7) |
| Cl1 Zn1 Cl2 | 113.82(8) | C3 C4 C5   | 122.3(7) |

**Table S3. Selected hydrogen bonding distances (Å) and angles (°) for PPR-HMB-Zn**

| D-H....A      | D-H (Å) | D....A (Å) | A...H (Å) | <D-HA(deg) |
|---------------|---------|------------|-----------|------------|
| N2--H2..O2    | 1.0000  | 1.7800     | 2.776     | 174.00     |
| O2—H11..O1    | 0.9300  | 1.8500     | 2.772     | 180.00     |
| O2—H12..Cl2   | 0.8500  | 2.4300     | 3.236     | 160.00     |
| C11--H11A..O2 | 0.9900  | 2.5100     | 3.416     | 153.00     |

**Table S4. Bond Lengths (Å) for Complex PZ-HMB-Zn.**

|         | Length/Å  |       | Length/Å |
|---------|-----------|-------|----------|
| Zn1 Cl1 | 2.2636(9) | C1 C2 | 1.509(4) |
| Zn1 Cl2 | 2.2300(9) | C2 C3 | 1.398(4) |
| Zn1 N1  | 2.004(3)  | C2 C7 | 1.387(4) |
| Zn1 O1  | 1.956(2)  | C3 C4 | 1.374(4) |
| N1 C8   | 1.291(4)  | C4 C5 | 1.406(4) |

|        | Length/Å |         | Length/Å |
|--------|----------|---------|----------|
| N1 C9  | 1.464(4) | C5 C6   | 1.424(4) |
| N2 C10 | 1.458(4) | C5 C8   | 1.448(4) |
| N2 C11 | 1.463(3) | C6 C7   | 1.396(4) |
| N2 C14 | 1.470(4) | C9 C10  | 1.529(4) |
| N3 C12 | 1.489(4) | C11 C12 | 1.508(4) |
| N3 C13 | 1.492(4) | C13 C14 | 1.513(4) |
| O1 C6  | 1.337(3) |         |          |

**Table S5.** Bond Angles (°) for Complex **PZ-HMB-Zn**.

| Angle/° |     |     |            | Angle/° |     |     |          |
|---------|-----|-----|------------|---------|-----|-----|----------|
| C12     | Zn1 | C11 | 108.82(4)  | C4      | C3  | C2  | 119.6(3) |
| N1      | Zn1 | C11 | 113.10(8)  | C3      | C4  | C5  | 122.6(3) |
| N1      | Zn1 | C12 | 113.72(8)  | C4      | C5  | C6  | 118.0(3) |
| O1      | Zn1 | C11 | 112.73(7)  | C4      | C5  | C8  | 116.1(3) |
| O1      | Zn1 | C12 | 112.96(7)  | C6      | C5  | C8  | 125.7(3) |
| O1      | Zn1 | N1  | 95.10(9)   | O1      | C6  | C5  | 123.1(3) |
| C8      | N1  | Zn1 | 119.5(2)   | O1      | C6  | C7  | 118.6(3) |
| C8      | N1  | C9  | 118.8(3)   | C7      | C6  | C5  | 118.3(3) |
| C9      | N1  | Zn1 | 121.66(19) | C2      | C7  | C6  | 122.7(3) |
| C10     | N2  | C11 | 109.2(2)   | N1      | C8  | C5  | 126.8(3) |
| C10     | N2  | C14 | 111.4(2)   | N1      | C9  | C10 | 110.2(3) |
| C11     | N2  | C14 | 108.0(2)   | N2      | C10 | C9  | 111.3(2) |
| C12     | N3  | C13 | 111.6(2)   | N2      | C11 | C12 | 111.2(2) |
| C6      | O1  | Zn1 | 121.15(18) | N3      | C12 | C11 | 111.0(2) |

| Angle/° |    |    |          | Angle/° |     |     |          |
|---------|----|----|----------|---------|-----|-----|----------|
| C3      | C2 | C1 | 120.4(3) | N3      | C13 | C14 | 110.9(2) |
| C7      | C2 | C1 | 120.7(3) | N2      | C14 | C13 | 110.1(3) |
| C7      | C2 | C3 | 118.8(3) |         |     |     |          |

**Table S6. Selected hydrogen bonding distances (Å) and angles (°) for PZ-HMB-Zn**

| D-H...A        | D-H (Å) | D...A (Å) | A...H (Å) | <D-HA(deg) |
|----------------|---------|-----------|-----------|------------|
| N3--H3A..C11   | 0.8600  | 2.5900    | 3.291     | 140.00     |
| N3--H3B..O1    | 0.9800  | 1.7400    | 2.708     | 169.00     |
| C7--H7..C11    | 0.9500  | 2.7600    | 3.683     | 163.00     |
| C12--H12A..C12 | 0.9900  | 2.6700    | 3.634     | 165.00     |

**Table S7. Kinetic parameters of Lineweaver-Burk plot for Phosphatase and Urease activity of both the complexes PPR-HMB-Zn and PZ-HMB-Zn**

| Kinetic parameters of Lineweaver Burk Plot |            |                                       |                       |                                     |                                   |
|--------------------------------------------|------------|---------------------------------------|-----------------------|-------------------------------------|-----------------------------------|
| Activity                                   | Material   | V <sub>max</sub> (M S <sup>-1</sup> ) | K <sub>M</sub> (M)    | K <sub>cat</sub> (S <sup>-1</sup> ) | K <sub>cat</sub> / K <sub>M</sub> |
| <b>Phosphatase</b>                         | PPR-HMB-Zn | 1×10 <sup>-3</sup>                    | 1×10 <sup>-3</sup>    | 20                                  | 20×10 <sup>3</sup>                |
|                                            | PZ-HMB-Zn  | 9.3×10 <sup>-4</sup>                  | 1.8×10 <sup>-3</sup>  | 18.6                                | 10.333×10 <sup>3</sup>            |
| <b>Urease</b>                              | PPR-HMB-Zn | 1.4×10 <sup>-4</sup>                  | 1.8×10 <sup>-2</sup>  | 2.81                                | 1.50×10 <sup>2</sup>              |
|                                            | PZ-HMB-Zn  | 9.08×10 <sup>-5</sup>                 | 0.93×10 <sup>-2</sup> | 1.82                                | 1.95×10 <sup>2</sup>              |

**Table S8. Comparison of kinetic parameters between our synthesized complexes to the literature survey for phosphatase-like activity**

| Kinetic parameters of Phosphatase-like Activity |            |                             |                         |                           |                      |               |
|-------------------------------------------------|------------|-----------------------------|-------------------------|---------------------------|----------------------|---------------|
|                                                 | Material   | $V_{max}$<br>( $M S^{-1}$ ) | $K_M(M)$                | $K_{cat}$<br>( $S^{-1}$ ) | $K_{cat}/ K_M$       | Std.<br>error |
| <b>Our Work</b>                                 | PPR-HMB-Zn | $1.04 \times 10^{-3}$       | $1.15 \times 10^{-3}$   | 20.8                      | $18.086 \times 10^3$ | 0.24503       |
|                                                 | PZ-HMB-Zn  | $9.1 \times 10^{-4}$        | $1.4 \times 10^{-3}$    | 18.2                      | $13 \times 10^3$     | 0.35807       |
| <b>Reference (41)</b>                           | Compound 1 | $9.6097 \times 10^{-4}$     | $7.905 \times 10^{-4}$  | 38.436                    | $48.6 \times 10^3$   | 0.03664       |
|                                                 | Compound 2 | $7.2397 \times 10^{-4}$     | $6.8116 \times 10^{-4}$ | 28.959                    | $42.5 \times 10^3$   | 0.07266       |
| <b>Reference (44)</b>                           | Complex 2  | $4.927 \times 10^{-4}$      | $1.451 \times 10^{-3}$  | 4.927                     | $3.395 \times 10^3$  | 0.35807       |
|                                                 | Complex 3  | $1.5505 \times 10^{-3}$     | $3.0944 \times 10^{-3}$ | 15.5056                   | $5.010 \times 10^3$  | 0.24053       |
|                                                 | Complex 4  | $8.715 \times 10^{-4}$      | $2.25 \times 10^{-3}$   | 8.7155                    | $3.873 \times 10^3$  | 0.21863       |
|                                                 | Complex 5  | $6.6332 \times 10^{-4}$     | $4.8262 \times 10^{-3}$ | 6.6332                    | $1.374 \times 10^3$  | 0.31941       |
| <b>Reference (45)</b>                           | Complex 1  | $8.07 \times 10^{-4}$       | $1.63 \times 10^{-3}$   | 16.15                     | $9.98 \times 10^3$   | 0.16          |
|                                                 | Complex 2  | $6.26 \times 10^{-4}$       | $1.56 \times 10^{-3}$   | 12.52                     | $8.02 \times 10^3$   | 0.15          |
|                                                 | Complex 3  | $4.56 \times 10^{-4}$       | $2.27 \times 10^{-3}$   | 9.116                     | $3.99 \times 10^3$   | 0.19          |
| <b>Reference (46)</b>                           | Complex 1  | $8.326 \times 10^{-4}$      | $8.8426 \times 10^{-4}$ | 17.6527                   | $19.963 \times 10^3$ | 0.000263      |
|                                                 | Complex 2  | $3.264 \times 10^{-4}$      | $6.4087 \times 10^{-4}$ | 6.5295                    | $10.188 \times 10^3$ | 0.000106      |
|                                                 | Complex 3  | $8.210 \times 10^{-4}$      | $10.911 \times 10^{-4}$ | 16.4204                   | $15.049 \times 10^3$ | 0.00836       |
|                                                 | Complex 4  | $11.930 \times 10^{-4}$     | $12.452 \times 10^{-4}$ | 23.8780                   | $19.176 \times 10^3$ | 0.000012      |

## Coordinates of the optimized complexes.

### 1a

|    |             |             |             |
|----|-------------|-------------|-------------|
| C  | -3.31208600 | -1.83421200 | 1.06959300  |
| C  | -2.41121000 | -0.78034100 | 0.74133000  |
| C  | -2.83559700 | 0.22274700  | -0.20936200 |
| C  | -4.14892600 | 0.08991600  | -0.75281000 |
| C  | -4.99872500 | -0.94995100 | -0.42115100 |
| C  | -4.56529200 | -1.93349300 | 0.51039500  |
| H  | -2.98824400 | -2.58016000 | 1.79357900  |
| H  | -4.45532200 | 0.85553200  | -1.45962700 |
| H  | -5.22637800 | -2.75159800 | 0.78218300  |
| O  | -2.11183900 | 1.23231400  | -0.57890100 |
| C  | -1.16200700 | -0.77008300 | 1.44030000  |
| H  | -1.07710300 | -1.54880700 | 2.21337500  |
| N  | -0.14771800 | 0.03921900  | 1.29284300  |
| C  | 0.93833400  | -0.08113700 | 2.25866200  |
| H  | 0.93969500  | -1.07391300 | 2.73422100  |
| H  | 0.78733800  | 0.65110800  | 3.06503700  |
| C  | 2.31341100  | 0.26596100  | 1.68615500  |
| H  | 3.07254700  | 0.12971000  | 2.46338000  |
| H  | 2.31856700  | 1.31246400  | 1.36603100  |
| Zn | -0.19453600 | 1.51176500  | -0.27741600 |
| C  | 4.12591500  | -0.07511500 | 0.04901700  |
| C  | 2.71182600  | -2.02796300 | 0.70251300  |
| H  | 2.10595000  | -0.30548100 | -0.31975600 |
| C  | 4.60338000  | -0.81890900 | -1.19745200 |
| H  | 4.80039100  | -0.23971500 | 0.89729500  |
| H  | 4.04206500  | 0.99883000  | -0.13232600 |
| C  | 3.17353700  | -2.78117800 | -0.54674600 |
| H  | 3.35295500  | -2.24716100 | 1.56494300  |
| H  | 1.68307600  | -2.28812700 | 0.95503200  |
| C  | 4.57414800  | -2.33918500 | -0.99054300 |
| H  | 5.61666800  | -0.47088200 | -1.42618300 |
| H  | 3.96652800  | -0.53926300 | -2.04377200 |
| H  | 3.14997800  | -3.85292300 | -0.32052300 |
| H  | 2.45204200  | -2.60587700 | -1.35344400 |
| H  | 4.85354500  | -2.85154700 | -1.91678900 |
| H  | 5.31445000  | -2.62949200 | -0.23107600 |
| N  | 2.75619800  | -0.53988400 | 0.48953500  |
| Cl | 0.90834900  | 3.36798100  | 0.48817000  |
| Cl | 1.10341000  | 0.32585900  | -1.92762100 |
| C  | -6.37675200 | -1.05363600 | -1.02893500 |
| H  | -6.57577900 | -0.22867500 | -1.71796100 |
| H  | -6.49161400 | -1.99445000 | -1.58104700 |
| H  | -7.14956900 | -1.04218300 | -0.25066700 |

### 2a

|   |             |             |             |
|---|-------------|-------------|-------------|
| C | -3.64173300 | 2.15664400  | -0.43682000 |
| C | -2.69884200 | 1.09428300  | -0.49781100 |
| C | -3.04784800 | -0.17107400 | 0.09602600  |
| C | -4.33615400 | -0.27933300 | 0.69535500  |
| C | -5.23485200 | 0.77403000  | 0.74430500  |

|    |             |             |             |
|----|-------------|-------------|-------------|
| C  | -4.87354200 | 2.01884300  | 0.16678000  |
| H  | -3.37236200 | 3.10908700  | -0.89004500 |
| H  | -4.58797200 | -1.24396500 | 1.12711400  |
| H  | -5.56838300 | 2.85354900  | 0.19492300  |
| O  | -2.26390400 | -1.21083200 | 0.11646000  |
| C  | -1.47273800 | 1.37037500  | -1.19886600 |
| H  | -1.43589500 | 2.37741500  | -1.63991800 |
| N  | -0.44211300 | 0.59952900  | -1.39105300 |
| C  | 0.61013900  | 1.12001400  | -2.27034700 |
| H  | 0.48393400  | 2.20419700  | -2.40377000 |
| H  | 0.47775100  | 0.66539700  | -3.26181800 |
| C  | 2.05902000  | 0.79007100  | -1.88175100 |
| H  | 2.69225700  | 1.27303300  | -2.64730700 |
| H  | 2.21497800  | -0.28860300 | -1.97180900 |
| Zn | -0.39705600 | -1.33650700 | -0.47374200 |
| C  | 3.97701900  | 0.91738600  | -0.43015100 |
| C  | 2.23118400  | 2.60925300  | -0.22504500 |
| H  | 1.76217300  | 0.12740600  | 0.51239300  |
| C  | 4.53793700  | 1.26975400  | 0.95062500  |
| H  | 4.51457700  | 1.49413200  | -1.20526300 |
| H  | 4.13179700  | -0.14471700 | -0.64396200 |
| C  | 2.72920900  | 2.99992200  | 1.16974500  |
| H  | 2.70071000  | 3.26103500  | -0.98579400 |
| H  | 1.15039700  | 2.75991500  | -0.28216500 |
| C  | 4.23031500  | 2.72588000  | 1.32313500  |
| H  | 5.61823700  | 1.08398300  | 0.94873300  |
| H  | 4.10636700  | 0.59335000  | 1.69980400  |
| H  | 2.50604800  | 4.05958800  | 1.34029400  |
| H  | 2.16565500  | 2.43145700  | 1.92105600  |
| H  | 4.56057000  | 2.94103100  | 2.34597400  |
| H  | 4.79373800  | 3.39881100  | 0.66106100  |
| N  | 2.52280200  | 1.19194800  | -0.53175300 |
| Cl | 0.86475900  | -2.69131000 | -1.92294400 |
| C  | 1.52859500  | -1.69586100 | 1.50850600  |
| N  | 0.34484500  | -2.56038700 | 1.37009300  |
| H  | 0.60061700  | -3.54230900 | 1.31264800  |
| H  | -0.28542500 | -2.41756100 | 2.15647200  |
| N  | 1.91612000  | -1.51457300 | 2.88340700  |
| H  | 2.45175600  | -2.31868400 | 3.20074300  |
| H  | 2.49456600  | -0.68555100 | 2.98065400  |
| O  | 2.58488200  | -2.23597800 | 0.76029700  |
| H  | 2.25274400  | -2.47674300 | -0.13472900 |
| O  | 1.07095600  | -0.46812100 | 0.97828000  |
| C  | -6.58504800 | 0.61498000  | 1.40182200  |
| H  | -7.39421600 | 0.84537900  | 0.69840700  |
| H  | -6.73529700 | -0.40319400 | 1.77079100  |
| H  | -6.69155400 | 1.30287800  | 2.24965400  |

### 3a

|   |             |            |             |
|---|-------------|------------|-------------|
| C | -0.84038300 | 3.22310800 | -0.86114500 |
| C | -0.91729800 | 1.81223900 | -0.73624200 |
| C | -2.06854000 | 1.24616600 | -0.09297700 |
| C | -3.06793900 | 2.13753600 | 0.37520300  |
| C | -2.97115500 | 3.51700400 | 0.24006400  |
| C | -1.82916800 | 4.06444400 | -0.38978700 |



|    |             |             |             |
|----|-------------|-------------|-------------|
| H  | 0.03469900  | 3.64801500  | -1.34853400 |
| H  | -3.94302600 | 1.69206200  | 0.84116800  |
| H  | -1.73460800 | 5.14040100  | -0.50598600 |
| O  | -2.24132400 | -0.04674000 | 0.09269200  |
| C  | 0.18968900  | 1.06317800  | -1.28800600 |
| H  | 0.97996100  | 1.68495100  | -1.72453600 |
| N  | 0.34559600  | -0.22310500 | -1.34482200 |
| C  | 1.57163000  | -0.74939500 | -1.94708700 |
| H  | 2.01540900  | -0.00663600 | -2.62355700 |
| H  | 1.30478400  | -1.62691700 | -2.54647200 |
| C  | 2.59185700  | -1.16942800 | -0.87379900 |
| H  | 3.36413600  | -1.80205000 | -1.35062300 |
| H  | 2.07760700  | -1.80148900 | -0.14175700 |
| Zn | -1.14084000 | -1.52088200 | -0.69011400 |
| C  | 3.53170600  | -0.32133400 | 1.21645800  |
| C  | 4.31662300  | 0.54776800  | -0.90450200 |
| C  | 3.98159800  | 0.94579700  | 1.95206500  |
| H  | 4.33875700  | -1.08246300 | 1.27163100  |
| H  | 2.65066700  | -0.74809500 | 1.70763200  |
| C  | 4.79989600  | 1.84744300  | -0.25241200 |
| H  | 5.15742000  | -0.17688400 | -0.94666300 |
| H  | 4.01474200  | 0.73954900  | -1.93993700 |
| C  | 5.15272400  | 1.62000100  | 1.22396200  |
| H  | 4.26152000  | 0.68764000  | 2.98076600  |
| H  | 3.13236500  | 1.63886000  | 2.00832400  |
| H  | 5.66670700  | 2.22957500  | -0.80524600 |
| H  | 4.00549900  | 2.60116400  | -0.32962000 |
| H  | 5.41442400  | 2.56801900  | 1.70884600  |
| H  | 6.04152100  | 0.97573900  | 1.28997000  |
| N  | 3.17969100  | -0.02708500 | -0.17722100 |
| Cl | -1.68210500 | -3.21641700 | -2.06743400 |
| C  | -1.27124800 | -2.28257900 | 2.26135600  |
| N  | -2.24824800 | -1.40503600 | 2.49175400  |
| H  | -2.73092400 | -1.40826000 | 3.37682900  |
| H  | -2.48062700 | -0.74318500 | 1.73682600  |
| O  | -0.99535800 | -3.08783900 | 3.30541300  |
| H  | -0.31286300 | -3.71214300 | 3.01272700  |
| O  | -0.63344100 | -2.38919300 | 1.19535400  |
| C  | -4.06521600 | 4.42640600  | 0.74618600  |
| H  | -4.48658500 | 5.02401600  | -0.07092900 |
| H  | -4.87987600 | 3.85970400  | 1.20509000  |
| H  | -3.67767500 | 5.13061400  | 1.49216600  |

### 1b

|   |            |             |             |
|---|------------|-------------|-------------|
| C | 3.99663800 | 1.75391200  | -0.01745900 |
| C | 2.77589600 | 1.02261400  | -0.06163200 |
| C | 2.83235300 | -0.41840400 | -0.12382900 |
| C | 4.12782000 | -1.02049400 | -0.14523700 |
| C | 5.29768100 | -0.28420400 | -0.09719400 |
| C | 5.22627500 | 1.13479900  | -0.03079400 |
| H | 3.94398300 | 2.84059000  | 0.02628700  |
| H | 4.15314700 | -2.10532200 | -0.19474900 |
| H | 6.13914600 | 1.72288100  | 0.00531400  |
| O | 1.78754500 | -1.17889400 | -0.16791100 |

|    |             |             |             |
|----|-------------|-------------|-------------|
| C  | 1.56852900  | 1.79237600  | -0.07491300 |
| H  | 1.73966300  | 2.87831000  | -0.08415500 |
| N  | 0.32469300  | 1.39231500  | -0.08838400 |
| C  | -0.68825600 | 2.44355100  | -0.19036500 |
| H  | -0.99581100 | 2.54251600  | -1.24042000 |
| H  | -0.26080900 | 3.41499200  | 0.09869900  |
| C  | -1.91478000 | 2.19882900  | 0.69523200  |
| H  | -2.49015000 | 3.14344100  | 0.75911600  |
| H  | -1.57002800 | 1.94871300  | 1.70300400  |
| Zn | -0.10846100 | -0.68448000 | 0.08225000  |
| C  | -3.70843500 | 0.62952400  | 1.25293100  |
| C  | -3.45687200 | 1.37800400  | -1.02283100 |
| C  | -4.15974900 | -0.79678700 | 0.89201100  |
| H  | -4.57630100 | 1.30906300  | 1.35825500  |
| H  | -3.19581800 | 0.57930000  | 2.21494500  |
| C  | -4.47185200 | 0.25880100  | -1.34378800 |
| H  | -4.00232300 | 2.34135900  | -0.99233700 |
| H  | -2.71896500 | 1.43213800  | -1.82548400 |
| H  | -5.19165000 | -0.98962400 | 1.19925300  |
| H  | -3.48093800 | -1.52636900 | 1.33826700  |
| H  | -5.48653100 | 0.51791500  | -1.02998100 |
| H  | -4.48018400 | 0.02746300  | -2.41050500 |
| H  | -3.07116200 | -1.21874800 | -0.90487700 |
| H  | -4.64551000 | -1.77207400 | -0.89319600 |
| N  | -2.76750300 | 1.09826900  | 0.23803600  |
| Cl | -1.01661500 | -1.35670800 | 2.11737400  |
| Cl | -1.37649600 | -1.53060100 | -1.79029200 |
| C  | 6.64629800  | -0.96350700 | -0.11369200 |
| H  | 6.54781800  | -2.05065100 | -0.17464500 |
| H  | 7.24490800  | -0.62674200 | -0.96900200 |
| H  | 7.21739200  | -0.72364300 | 0.79169900  |
| N  | -4.07330400 | -0.97769800 | -0.60261400 |

## 2b

|    |             |             |             |
|----|-------------|-------------|-------------|
| C  | -3.92462600 | -1.89811100 | -0.39742400 |
| C  | -2.78711700 | -1.17093700 | 0.04782200  |
| C  | -2.87434600 | 0.26187300  | 0.13972400  |
| C  | -4.11804300 | 0.86603100  | -0.21031700 |
| C  | -5.21174400 | 0.13461700  | -0.64350400 |
| C  | -5.10684100 | -1.27805100 | -0.74116100 |
| H  | -3.85058900 | -2.98251800 | -0.45959100 |
| H  | -4.17326200 | 1.94784900  | -0.12498400 |
| H  | -5.95786600 | -1.86404700 | -1.07697000 |
| O  | -1.88951400 | 1.01925500  | 0.51828500  |
| C  | -1.63561100 | -1.94204700 | 0.42337500  |
| H  | -1.79505800 | -3.02721700 | 0.34283700  |
| N  | -0.47039600 | -1.54884300 | 0.85576700  |
| C  | 0.42513300  | -2.63693100 | 1.28610800  |
| H  | 0.21448600  | -3.53869600 | 0.69241700  |
| H  | 0.19461100  | -2.89260000 | 2.32972600  |
| C  | 1.91684200  | -2.29832400 | 1.24278400  |
| H  | 2.47492800  | -3.22501300 | 1.48929300  |
| H  | 2.13644500  | -1.57169100 | 2.02966000  |
| Zn | 0.00647700  | 0.54896500  | 0.89761900  |

|    |             |             |             |
|----|-------------|-------------|-------------|
| C  | 3.70328300  | -1.12100000 | 0.12202600  |
| C  | 2.29109100  | -2.55522100 | -1.19192000 |
| C  | 4.21679900  | -0.63564000 | -1.25255700 |
| H  | 4.42557000  | -1.85382300 | 0.53199700  |
| H  | 3.63634000  | -0.29168900 | 0.83171700  |
| C  | 2.36102300  | -1.66617800 | -2.45676400 |
| H  | 3.10334600  | -3.30967700 | -1.20107200 |
| H  | 1.34919200  | -3.10868000 | -1.19612500 |
| H  | 4.90182700  | -1.37716800 | -1.69273500 |
| H  | 4.77089600  | 0.29981300  | -1.13824500 |
| H  | 2.86989000  | -2.21457900 | -3.26355500 |
| H  | 1.35350700  | -1.41286100 | -2.80206900 |
| H  | 1.89999600  | 0.57700400  | -1.33753000 |
| H  | 3.37136600  | 0.03940800  | -3.00089600 |
| N  | 2.36489400  | -1.70580000 | -0.01059500 |
| Cl | 1.53382500  | 0.96631900  | 2.63753400  |
| C  | 1.41076100  | 2.45140300  | -0.67986300 |
| N  | 0.30314700  | 2.87524600  | 0.15430900  |
| H  | 0.53272200  | 3.68670900  | 0.71772400  |
| H  | -0.54594800 | 3.02919100  | -0.38302500 |
| N  | 1.48235100  | 3.15208900  | -1.94021900 |
| H  | 1.75979500  | 4.11613600  | -1.77010900 |
| H  | 2.19596200  | 2.73259200  | -2.53162900 |
| O  | 2.61172500  | 2.60366500  | 0.03523700  |
| H  | 2.49872300  | 2.17211900  | 0.91116000  |
| O  | 1.12699000  | 1.07924300  | -0.91307100 |
| C  | -6.50881300 | 0.81618800  | -1.00957100 |
| H  | -7.33277400 | 0.45372100  | -0.38288700 |
| H  | -6.44186700 | 1.90067500  | -0.88761700 |
| H  | -6.78213400 | 0.60681700  | -2.05099800 |
| N  | 3.06003400  | -0.39718600 | -2.13630300 |

### 3b

|    |             |             |             |
|----|-------------|-------------|-------------|
| C  | -4.01468100 | -1.50142900 | -0.92592400 |
| C  | -2.72392300 | -1.04679300 | -0.54688100 |
| C  | -2.59389400 | 0.26665900  | 0.02972300  |
| C  | -3.78637500 | 1.02843600  | 0.18944000  |
| C  | -5.03763700 | 0.55755500  | -0.17965500 |
| C  | -5.14821400 | -0.73482800 | -0.75195400 |
| H  | -4.10189500 | -2.49359800 | -1.36507300 |
| H  | -3.68196500 | 2.01180900  | 0.64075100  |
| H  | -6.12114500 | -1.11696200 | -1.04776000 |
| O  | -1.45121200 | 0.78626900  | 0.38791100  |
| C  | -1.62403300 | -1.93932600 | -0.79871800 |
| H  | -1.90669900 | -2.86508600 | -1.32063600 |
| N  | -0.37279700 | -1.77564000 | -0.49128800 |
| C  | 0.57141500  | -2.82222200 | -0.90217200 |
| H  | 0.63639400  | -2.84363400 | -1.99879800 |
| H  | 0.21780100  | -3.81353300 | -0.58747600 |
| C  | 1.95861700  | -2.59636800 | -0.28763500 |
| H  | 2.66826900  | -3.31559900 | -0.73533500 |
| H  | 1.91073300  | -2.79320600 | 0.78757700  |
| Zn | 0.30162700  | -0.19872700 | 0.75316600  |
| C  | 3.65762200  | -0.96099200 | 0.32566900  |

|    |             |             |             |
|----|-------------|-------------|-------------|
| C  | 2.70260500  | -0.85644600 | -1.84582300 |
| C  | 4.01077300  | 0.53206200  | 0.32962300  |
| H  | 4.48467800  | -1.56361200 | -0.09763600 |
| H  | 3.49222900  | -1.27821500 | 1.35909500  |
| C  | 2.95436600  | 0.64640400  | -1.97203500 |
| H  | 3.56964000  | -1.43827400 | -2.21529700 |
| H  | 1.84456800  | -1.10900600 | -2.47524500 |
| H  | 5.03813500  | 0.65847500  | 0.68593900  |
| H  | 3.34931900  | 1.03208400  | 1.03543300  |
| H  | 3.32874100  | 0.87513400  | -2.97533700 |
| H  | 1.98953200  | 1.14833600  | -1.87200700 |
| H  | 2.91216200  | 2.79649500  | -0.63812600 |
| H  | 4.82691900  | 1.26008100  | -1.41460400 |
| N  | 2.42404500  | -1.20816100 | -0.44545600 |
| Cl | 0.94372000  | -0.96487700 | 2.82070800  |
| C  | 1.10982700  | 2.72858100  | -0.04602700 |
| N  | -0.09433500 | 3.31593200  | -0.08602100 |
| H  | -0.22473800 | 4.17658800  | -0.59420100 |
| H  | -0.88178500 | 2.71307600  | 0.16304000  |
| O  | 2.12309300  | 3.41596200  | -0.57600100 |
| O  | 1.29937700  | 1.60407000  | 0.45332600  |
| C  | -6.27605900 | 1.39715200  | 0.02512600  |
| H  | -6.98891600 | 0.88804800  | 0.68491700  |
| H  | -6.03664100 | 2.36664500  | 0.47046900  |
| H  | -6.79125500 | 1.57668300  | -0.92630400 |
| N  | 3.90613600  | 1.21799600  | -0.98992400 |
